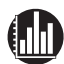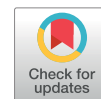

# Should Viscous Fiber Supplements Be Considered in Diabetes Control? Results From a Systematic Review and Meta-analysis of Randomized Controlled Trials

Diabetes Care 2019;42:755–766 | <https://doi.org/10.2337/dc18-1126>

Elena Jovanovski,<sup>1,2</sup> Rana Khayyat,<sup>1,2</sup>  
Andreea Zurbau,<sup>1,2</sup> Allison Komishon,<sup>1</sup>  
Nourah Mazhar,<sup>1,2</sup>  
John L. Sievenpiper,<sup>1,2,3,4,5</sup>  
Sonia Blanco Mejia,<sup>1,2,3</sup>  
Hoang Vi Thanh Ho,<sup>1</sup> Dandan Li,<sup>1,2</sup>  
Alexandra L. Jenkins,<sup>1</sup> Lea Duvnjak,<sup>6</sup> and  
Vladimir Vuksan<sup>1,2,4,5</sup>

## OBJECTIVE

Evidence from randomized controlled trials (RCTs) suggests that viscous dietary fiber may offer beneficial effects on glycemic control and, thus, an improved cardiovascular disease risk profile. Our purpose was to conduct a systematic review and meta-analysis of RCTs to synthesize the therapeutic effect of viscous fiber supplementation on glycemic control in type 2 diabetes.

## RESEARCH DESIGN AND METHODS

MEDLINE, Embase, and Cochrane Central Register of Controlled Trials were searched through 15 June 2018. We included RCTs  $\geq 3$  weeks in duration that assessed the effects of viscous fiber on markers of glycemic control in type 2 diabetes. Two independent reviewers extracted data. Data were pooled using the generic inverse variance method and expressed as mean differences (MD) with 95% CIs. Heterogeneity was assessed (Cochran Q statistic) and quantified ( $I^2$  statistic). The Grading of Recommendations Assessment, Development, and Evaluation (GRADE) approach was used to evaluate the overall certainty of the evidence.

## RESULTS

We identified 28 eligible trial comparisons ( $n = 1,394$ ). Viscous fiber at a median dose of  $\sim 13.1$  g/day significantly reduced HbA<sub>1c</sub> (MD  $-0.58\%$  [95% CI  $-0.88, -0.28$ ];  $P = 0.0002$ ), fasting blood glucose (MD  $-0.82$  mmol/L [95% CI  $-1.32, -0.31$ ];  $P = 0.001$ ), and HOMA-insulin resistance (IR) (MD  $-1.89$  [95% CI  $-3.45, -0.33$ ];  $P = 0.02$ ) compared with control and in addition to standard of care. The certainty of evidence was graded moderate for HbA<sub>1c</sub>, fasting glucose, fasting insulin, and HOMA-IR and low for fructosamine.

## CONCLUSIONS

Viscous fiber supplements improve conventional markers of glycemic control beyond usual care and should be considered in the management of type 2 diabetes.

<sup>1</sup>Clinical Nutrition and Risk Factor Modification Centre, St. Michael's Hospital, Toronto, Canada

<sup>2</sup>Department of Nutritional Sciences, Faculty of Medicine, University of Toronto, Toronto, Canada

<sup>3</sup>Toronto 3D Knowledge Synthesis and Clinical Trials Unit, St. Michael's Hospital, Toronto, Canada

<sup>4</sup>Division of Endocrinology and Metabolism, St. Michael's Hospital, Toronto, Canada

<sup>5</sup>Li Ka Shing Knowledge Institute, St. Michael's Hospital, Toronto, Canada

<sup>6</sup>Vuk Vrhovac University Clinic for Diabetes, Endocrinology and Metabolic Diseases, Merkur University Hospital, University of Zagreb School of Medicine, Zagreb, Croatia

Corresponding author: Vladimir Vuksan, [v.vuksan@utoronto.ca](mailto:v.vuksan@utoronto.ca)

Received 23 May 2018 and accepted 19 September 2018

This article contains Supplementary Data online at <http://care.diabetesjournals.org/lookup/suppl/doi:10.2337/dc18-1126/-/DC1>.

E.J. and R.K. are co-first authors.

This article is part of a special article collection available at <http://care.diabetesjournals.org/evolution-nutritional-therapy>.

© 2019 by the American Diabetes Association. Readers may use this article as long as the work is properly cited, the use is educational and not for profit, and the work is not altered. More information is available at <http://www.diabetesjournals.org/content/license>.

Despite advancements in preventive medicine and pharmacotherapy, diabetes remains an overwhelming health problem. Diet and lifestyle are among the main pillars in the management of type 2 diabetes, with fiber consistently considered a significant component of dietary interventions steering glycemic control (1). However, a 2014 position statement from the American Diabetes Association (ADA) deemphasized the impact of fiber in diets, reporting its potential for glucoregulation as marginal, with modest improvements of 0.2–0.3% in HbA<sub>1c</sub> requiring “unrealistic” quantities of >50 g/day (2,3).

In contrast, there is a plethora of clinical evidence on using soluble viscous dietary fiber supplements in the regulation of hyperglycemia and reduction of conventional cardiovascular disease risk factors (4–7). This has been reflected in the 2018 ADA *Standards of Medical Care in Diabetes*, which recommends an increase in viscous fiber intake from sources such as oats, legumes, and citrus (8). Nonetheless, the commonly shared view is that it is difficult to achieve a high dietary fiber intake within the context of a conventional Western diet without the use of fortified foods or addition of fiber isolates (9,10). In response, many isolated fiber supplements have been developed and extensively studied over the past three decades with the intention of offering convenience of use and facilitating clinical study of the potency of a concentrated source, with a favorable record on glycemic benefits (11).

Although the mechanisms of action have yet to be elucidated, it is hypothesized that fiber isolates, such as guar gum,  $\beta$ -glucan, or psyllium, have the ability to increase viscosity in the human gut and reduce the rate of nutrient absorption, and thus demonstrate greater potential to flatten the postprandial glycemic and insulinemic responses compared with nonviscous fibers (4,12,13). It is less certain, however, whether and to what extent the postprandial effects are reliably reflected in long-term improvements, such as reduction in HbA<sub>1c</sub>. Therefore, the magnitude of benefit from viscous fiber intake in diabetes management remains ambiguous and warrants comprehensive and robust assessment. Hence, the objective of this study was to evaluate, through a systematic review and meta-analysis of

randomized controlled trials (RCTs), the effect of viscous dietary fiber supplementation on glycemic parameters in individuals with type 2 diabetes receiving usual care.

## RESEARCH DESIGN AND METHODS

### Protocol and Registration

This study followed the guideline of the Cochrane Handbook for Systematic Reviews of Interventions (14) and results were reported in accordance with the Preferred Reporting Items for Systematic Reviews and Meta-Analyses (PRISMA) (15). The protocol is available at ClinicalTrials.gov (NCT02629263).

### Data Sources and Searches

MEDLINE, Embase, and the Cochrane Central Register of Controlled Trials were searched using the strategy presented in Supplementary Table 1 to identify RCTs that investigated the effect of viscous fiber on glycemic outcomes in individuals with type 2 diabetes. The search was performed through 15 June 2018. A manual search of the references of included trials supplemented the electronic search. No language restrictions were applied.

### Study Selection

Included RCTs were those conducted in individuals with type 2 diabetes with  $\geq 3$  weeks duration (16) that investigated the effect of viscous fiber supplementation ( $\beta$ -glucan, guar gum, konjac, psyllium, pectin, xanthan gum, locust bean gum, alginate, agar) compared with an appropriate control (i.e., fiber-free supplement or one containing insoluble fiber, background diet, placebo) on at least one of these glycemic measures: HbA<sub>1c</sub>, fasting glucose, fasting insulin, HOMA-insulin resistance (IR), and fructosamine. For multiarm trials, we included the groups that allowed us to isolate the effect of viscous fiber supplements from control treatments. Trials that precluded the isolation of the effect of the viscous fiber because it was incorporated into a fiber mixture or included as part of a complex dietary pattern, or because of lack of comparison with a calorie-matched control, were excluded. Glycemic outcomes criteria were determined in accordance with the ADA and Diabetes Canada Clinical Practice Guidelines (17,18).

### Data Extraction and Quality Assessment

Using a standardized proforma, two independent reviewers (R.K. and N.M.) assessed articles and extracted relevant data from each report, including fiber type, study design (crossover or parallel), participant characteristics, comparator, dose, duration, background diet, compliance measures, statistical analysis, country of conducted research, and funding sources. Disagreement between reviewers was resolved by consensus or when necessary by a third reviewer. If  $\beta$ -glucan was not reported, viscous fiber from oat  $\beta$ -glucan was conservatively estimated at 5% (19). The mean and SD were extracted for HbA<sub>1c</sub>, fasting glucose, fasting insulin, fructosamine, and HOMA-IR at change from baseline for both control and intervention groups. When SD values were not reported, they were calculated from available data (95% CIs or SEM) using standard formulae (14). Authors were contacted for additional information where necessary (20,21).

The Cochrane risk-of-bias tool was used to assess the study risk of bias (14). Domains of bias assessment include sequence generation, allocation concealment, blinding, incomplete outcome data, and selective outcome reporting. The study was considered low risk of bias when proper methods were taken to reduce bias, high risk of bias when improper study methods likely affected the true outcome, and unclear risk of bias when insufficient information was provided to permit judgment of bias level.

### Data Synthesis and Analysis

Review Manager (RevMan) version 5.3 (The Nordic Cochrane Centre, The Cochrane Collaboration, Copenhagen, Denmark) was used for primary data analyses and Stata version 14 (StataCorp, College Station, TX) for subgroup, dose-response, and publication bias analyses. The difference between change-from-baseline values for intervention and control arms was derived from each trial for the end points of HbA<sub>1c</sub>, fasting glucose, fasting insulin, fructosamine, and HOMA-IR. When change from baseline was not reported, the mean and SD for baseline and end values were used to calculate change from baseline for both control and intervention groups. When HOMA-IR was not reported, it was calculated using the equation (HOMA-IR = fasting

insulin (microU/L)  $\times$  fasting glucose (mmol/L)/22.5) (22). A previously published formula was used to derive SD for calculated values of HOMA-IR (23). If change-from-baseline values were not available, end-of-treatment values were used. For multiarm trials, a weighted average was used to create a single pairwise comparison and to reduce the unit-of-analysis error. A correlation coefficient of 0.50 was assumed for SD of crossover trials. Sensitivity analysis was conducted with the use of different correlation coefficient values (0.25 and 0.75) to test for the robustness of the effect size. Pooled analyses were conducted using the generic inverse variance method with random-effects models. When data from  $<5$  trials were available, fixed-effects models were used. Data were expressed as mean difference (MD) with 95% CI and significance was considered as  $P < 0.05$ . Interstudy heterogeneity was assessed using the Cochran  $Q$  statistic and quantified using the  $I^2$  statistic, with  $I^2 \geq 50\%$  indicating substantial heterogeneity and  $P < 0.10$  significance (14). If  $>10$  studies were included for an outcome, sources of heterogeneity were explored with a priori subgroup analyses for baseline values of HbA<sub>1c</sub>, fasting glucose, and HOMA-IR, as well as for dose, design, duration, fiber type, and food matrix (i.e., powder, capsule, food source) with  $P < 0.05$  significance. A post hoc analysis was also conducted for baseline BMI. To determine whether any single study exerted particular influence on the overall results, an additional sensitivity analysis was performed by removing each study individually from the meta-analysis and recalculating the effect size of the remaining studies. Dose-response analysis was performed using meta-regressions to generate linear and nonlinear dose estimates using the MKSPLINE procedure, with  $P < 0.05$  significance. Visual inspection of funnel plots was used to assess publication bias and formally tested using Egger and Begg tests, where  $P < 0.05$  was considered evidence for small-study effects. If funnel plot asymmetry was suspected, the Duval and Tweedie “trim and fill” method was performed to impute missing study data and correct for asymmetry.

### Grading of the Evidence

The Grading of Recommendations Assessment, Development, and Evaluation (GRADE) approach (24) was used

to assess the overall certainty of the evidence. Quality can be graded as very low, low, moderate, or high. Evidence obtained from RCTs receives an initial grade of high. Scores can be downgraded based on study limitations (assessed by the Cochrane risk-of-bias tool), inconsistency (substantial unexplained heterogeneity,  $I^2 > 50\%$ ,  $P < 0.10$ ), indirectness (presence of factors that limit the generalizability of the findings), imprecision (CI for the effect estimates that are wide or cross a minimally important difference for benefit or harm), and publication bias (significant evidence of small-study effects).

## RESULTS

### Search Results

Figure 1 shows the flow of the literature. Our initial search yielded 2,716 publications, of which 66 articles were reviewed in full and 27 (28 trial comparisons) were included in the final analysis ( $n = 1,394$ ) (20,21,25–49). Twenty trial comparisons reported on HbA<sub>1c</sub> ( $n = 1,148$ ) (21,25,27,29–35,37–42,44, 47–49), 28 on fasting glucose ( $n = 1,394$ ) (20,21,25–48), 9 on fasting insulin ( $n = 228$ ) (21,25,26,29,35,38,41,46,48), and 2 on fructosamine ( $n = 23$ ) (42,46), and 11 trial comparisons reported on HOMA-IR directly or reported enough

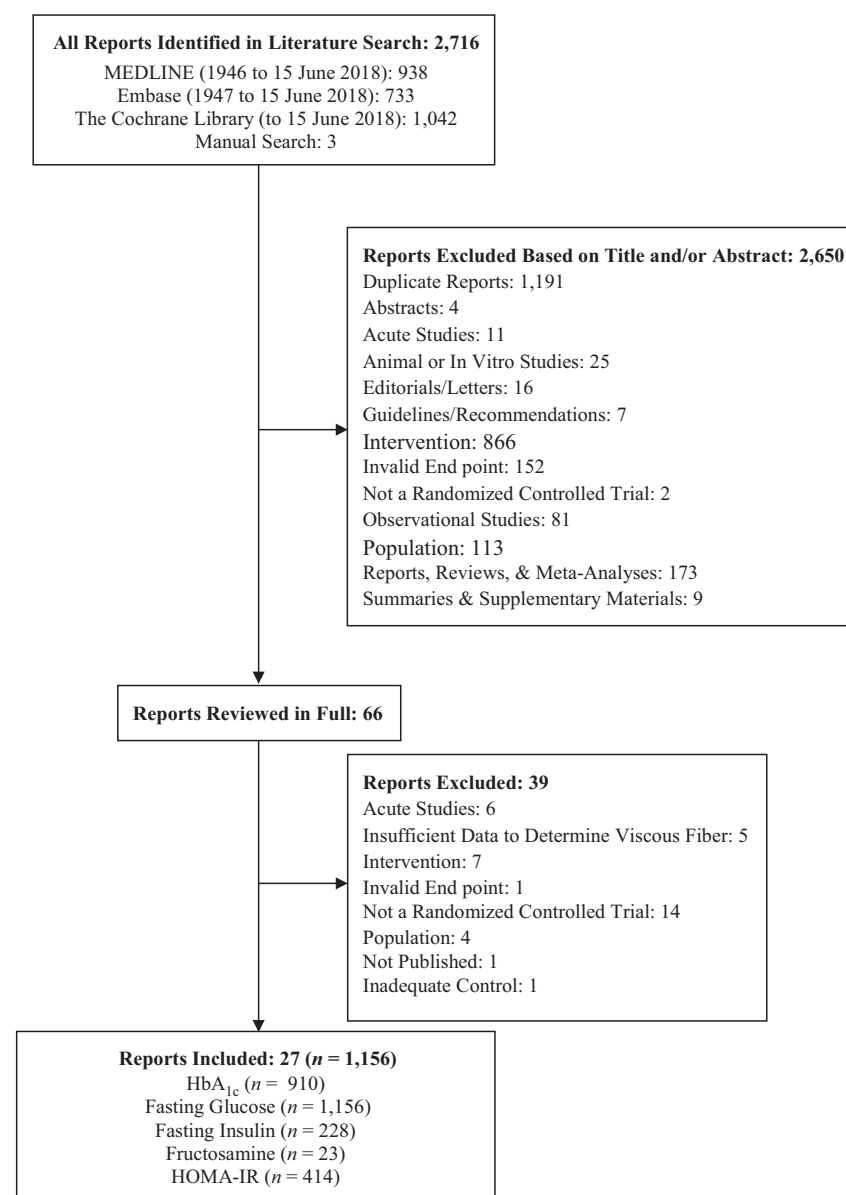

Figure 1—Flow of the literature.

information for calculation ( $n = 652$ ) (21,25,26,29,35,37–39,41,46,48).

### Trial Characteristics

Table 1 shows the characteristics of included studies. The majority of trials were conducted in an outpatient setting, with 15 (54%) in Europe, 5 (18%) in Asia, 2 (7%) in North America, 4 (14%) in the Middle East, and 2 (7%) in South America. Of the included trials, 15 (54%) were crossover design and 13 (46%) parallel design. The median age of participants was 60 years (range 48–67), with a median BMI of 27 kg/m<sup>2</sup> (range 26–32). The median dose of viscous fiber supplementation for all included trials was 13.1 g/day (range 2.55–21.0) and median duration was 8 weeks (range 3–52). The Cochrane risk-of-bias tool (Supplementary Fig. 1) showed that 25 trials (90%) had unclear risk of bias and three trials (10%) had low risk of bias for sequence generation. All trials (100%) had unclear risk of bias for allocation concealment. Seventeen trials (61%) had low risk of bias, 8 trials (29%) unclear risk, and 3 trials (10%) high risk of bias for blinding. Sixteen trials (57%) had low risk of bias, 8 trials (29%) unclear risk, and 4 (14%) high risk of bias for incomplete outcome data.

The majority of trials (96%) had low risk but one (4%) had high risk of bias for selective outcome reporting. Funding sources included agency for 6 trials (21%), industry for 5 (18%), agency-industry for 5 (18%), and were not reported for 12 (43%).

### Effect on HbA<sub>1c</sub>

Figure 2 shows the effect of viscous fiber supplementation on HbA<sub>1c</sub> in individuals with diabetes. A median dose of 10.9 g/day for a median duration of 8 weeks resulted in a significant reduction in HbA<sub>1c</sub> (MD  $-0.58\%$  [95% CI  $-0.88, -0.28$ ];  $P = 0.0002$ ) compared with control, with evidence of substantial interstudy heterogeneity ( $I^2 = 91\%$ ,  $P < 0.00001$ ). Systematic removal of individual studies did not alter the results or explain heterogeneity. The use of different levels of correlation coefficients (0.25 and 0.75) for crossover studies did not influence the HbA<sub>1c</sub> effect or heterogeneity in the overall pooled results.

Supplementary Table 2 and Supplementary Fig. 2 show the results of continuous and categorical a priori and post hoc subgroup analyses for HbA<sub>1c</sub>.

Continuous meta-regression analyses did not reveal an effect of dose, duration, baseline fasting glucose, or baseline BMI. Categorical meta-regression analyses, however, revealed a greater reduction in trials with higher baseline HbA<sub>1c</sub> values (between-subgroup difference  $-0.70\%$  [ $-1.36, -0.03$ ];  $P = 0.04$ ), with residual  $I^2 = 84\%$ .

### Effect on Fasting Glucose

Figure 3A shows the effect of viscous fiber supplementation on fasting glucose in individuals with diabetes. Compared with control, a median dose of 13.1 g/day for a median duration of 8 weeks resulted in a significant reduction in fasting glucose (MD  $-0.82$  mmol/L [95% CI  $-1.32, -0.31$ ];  $P = 0.001$ ) with evidence of substantial heterogeneity ( $I^2 = 92\%$ ,  $P < 0.00001$ ). Systematic removal of individual studies did not alter results or explain heterogeneity. The use of different levels of correlation coefficients (0.25 and 0.75) for crossover studies did not influence the fasting glucose effect or heterogeneity in the overall pooled results.

Continuous and categorical a priori and post hoc subgroup analyses did not reveal any significant subgroup effects and failed to explain heterogeneity (Supplementary Table 2 and Supplementary Fig. 3).

### Effect on Fasting Insulin

Figure 3B shows the effect of viscous fiber supplementation on fasting insulin in individuals with diabetes. With a median dose of 15.0 g/day and median duration of 8 weeks, no significant effect on fasting insulin was observed (MD  $-17.56$  pmol/L [95% CI  $-37.54, 2.42$ ];  $P = 0.08$ ) compared with control, with substantial interstudy heterogeneity ( $I^2 = 90\%$ ,  $P < 0.00001$ ). Removal of Abutair et al. (25) during our sensitivity analyses reduced overall heterogeneity ( $I^2 = 43\%$ ,  $P = 0.09$ ) and modified the effect size (MD  $-9.18$  pmol/L [ $-18.97, 0.60$ ];  $P = 0.07$ ). The use of different levels of correlation coefficients (0.25 and 0.75) for crossover studies did not influence the fasting insulin effect or heterogeneity in the overall pooled results.

Continuous and categorical a priori and post hoc subgroup analyses were not performed for fasting insulin as  $<10$  trial comparisons were available for analyses.

### Effect on HOMA-IR

Figure 3C shows the effect of viscous fiber supplementation on HOMA-IR in individuals with diabetes. A median dose of 10.5 g/day for a median duration of 6 weeks significantly reduced HOMA-IR (MD  $-1.89$  [95% CI  $-3.45, -0.33$ ];  $P = 0.02$ ) compared with control, with substantial evidence of interstudy heterogeneity ( $I^2 = 94\%$ ,  $P < 0.00001$ ). Removal of Abutair et al. (25) during sensitivity analyses reduced overall heterogeneity ( $I^2 = 63\%$ ,  $P = 0.004$ ) and modified the effect on HOMA-IR (MD  $-1.07$  [ $-1.88, -0.26$ ];  $P = 0.01$ ). The use of different levels of correlation coefficients (0.25 and 0.75) for the crossover studies did not influence the HOMA-IR effect or heterogeneity in the overall pooled results.

Supplementary Table 2 and Supplementary Fig. 4 show the findings of a priori and post hoc subgroup analyses for HOMA-IR. Continuous meta-regression analysis revealed that the effect of viscous fiber on HOMA-IR is modified by baseline values (MD  $-0.42$  [ $-0.67, -0.16$ ];  $P < 0.01$ ), with residual  $I^2 = 72\%$ . Categorical meta-regression analysis was consistent with these findings, revealing a greater reduction in trials with higher baseline HOMA-IR values (between-subgroup difference  $-3.49$  [ $-5.85, -1.14$ ];  $P < 0.01$ ), with a residual  $I^2 = 67\%$ . Additional subgroup analyses were not significant.

### Effect on Fructosamine

Figure 3D shows the effect of viscous fiber supplementation on fructosamine in individuals with type 2 diabetes. Only two trials reported on this outcome measure, with a median dose of 13.2 g/day and median duration of 7.5 weeks. Compared with control, no significant effect was observed for fructosamine (MD  $-0.12$  mmol/L [95% CI  $-0.39, 0.14$ ];  $P = 0.37$ ) and no evidence of interstudy heterogeneity was present ( $I^2 = 0\%$ ,  $P = 0.60$ ). Systematic removal of individual studies and the use of different levels of correlation coefficients (0.25 and 0.75) for crossover studies did not influence the fructosamine effect or heterogeneity.

Continuous and categorical a priori and post hoc subgroup analyses were not performed as  $<10$  trial comparisons were available for analyses.

Table 1—Characteristics of included trial comparisons

| Study               | Participants*<br>M:F | Age* y                          | BMI*<br>Kg/m <sup>2</sup> | Baseline<br>HbA1c*<br>% (mmol/L/mol)        | Baseline FG*<br>mmol/L          | Design   | Duration<br>wk | Viscous<br>Fiber | Control            | Dose**<br>g/d | Food<br>Matrix | Diet               | Funding | Country        |
|---------------------|----------------------|---------------------------------|---------------------------|---------------------------------------------|---------------------------------|----------|----------------|------------------|--------------------|---------------|----------------|--------------------|---------|----------------|
| Abutair, 2016       | 36<br>18M:18F        | 47.5†                           | 31.7                      | C: 8.5 (69)<br>T: 8.5 (69)                  | C: 8.7<br>T: 9.0                | P<br>n/r | 8              | psyllium         | no<br>psyllium     | 10.5          | powder         | usual              | n/r     | Palestine      |
| Abutair, 2018       | 36<br>18M:18F        | 47.5                            | n/r                       | n/r                                         | 8.9                             | P<br>n/r | 8              | psyllium         | no<br>psyllium     | 10.5          | powder         | usual              | n/r     | Palestine      |
| Aro, 1981           | 9<br>5M:4F           | 53                              | n/r                       | n/r                                         | C: 11.5<br>T: 10.6              | C<br>DB  | 12             | guar gum         | wheat<br>flour     | 21            | granules       | usual              | A-I     | Finland        |
| Baker, 1988         | 30<br>n/r            | C: 64.3<br>T: 59.1              | n/r                       | C: 11.9 (107)<br>T: 12.0 (108)              | C: 11.7<br>T: 12.1              | P<br>SB  | 9              | guar gum         | n/r                | 15            | tablets        | usual              | n/r     | United Kingdom |
| Chen, 2003          | 22<br>10M:12F        | 64                              | 25.5                      | n/r                                         | 9.1                             | C<br>DB  | 4              | konjac           | cornstarch         | 3.6           | capsules       | NCEP               | A-I     | Taiwan         |
| Chuang, 1992        | 13<br>n/r            | 54.9                            | 25.8                      | 7.9 (63)                                    | 10.6                            | C<br>DB  | 8              | guar gum         | n/r                | 15            | powder         | liquid meals       | A       | Taiwan         |
| Cugnet-Anceau, 2010 | 53<br>n/r            | C: 61.8<br>T: 61.9              | C: 29.0<br>T: 30.5        | C: 7.5 (58)<br>T: 7.3 (56)                  | C: 8.4<br>T: 8.8                | P<br>DB  | 8              | β-glucan         | soup               | 3.5           | enriched soups | usual              | A       | Sweden         |
| Dall'Alba, 2013     | 44<br>27M:17F        | C: 63.6<br>T: 60.5              | C: 29.3<br>T: 30.2        | C: 7.0 (53)<br>T: 6.9 (52)                  | C: 7.9<br>T: 7.4                | P<br>OL  | 6              | guar gum         | n/r                | 10            | powder         | usual              | A-I     | Brazil         |
| Feinglos, 2013      | 33<br>n/r            | C: 56.5<br>TA: 61.8<br>TB: 64.8 | n/r                       | C: 7.6 (60)<br>TA: 7.4 (57)<br>TB: 7.9 (63) | C: 11.8<br>TA: 11.2<br>TB: 10.3 | P<br>DB  | 12             | psyllium         | fiber-free placebo | 10.2          | n/r            | restricted         | n/r     | United States  |
| Fuessli, 1987       | 18<br>12M:6F         | 61.3                            | 30.1                      | C: 9.3 (78)<br>T: 9.7 (83)                  | 9.1                             | C<br>DB  | 4              | guar gum         | wheat bran         | 15            | granules       | usual              | A       | United Kingdom |
| Holman, 1987        | 29<br>24M:5F         | 54.2                            | 26.5                      | n/r                                         | n/r                             | C<br>n/r | 8              | guar gum         | n/r                | 15            | tablets        | n/r                | I       | United Kingdom |
| Laajam, 1990        | 39<br>11M:28F        | 51.5                            | 31.2                      | 11.4 (101)                                  | 12.5                            | C<br>DB  | 4              | guar gum         | beef gelatin       | 15            | granules       | usual              | n/r     | Saudi Arabia   |
| Lalor, 1990         | 19<br>8M:11F         | 56.5                            | 31.5                      | n/r                                         | 10.9                            | C<br>DB  | 12             | guar gum         | n/r                | 15            | granules       | usual              | A-I     | United Kingdom |
| Li, 2016            | 228<br>n/r           | 59                              | 27                        | C: 8.1 (65)<br>TA: 8.4 (68)<br>TB: 8.3 (67) | C: 9.5<br>TA: 9.9<br>TB: 9.7    | P<br>n/r | 52             | β-glucan         | no<br>β-glucan     | 3.98          | oat            | low-fat high-fiber | I       | China          |
| Liatis, 2009        | 41<br>n/r            | C: 66.5<br>T: 60.2              | C: 27.0<br>T: 29.6        | C: 6.9 (52)<br>T: 7.3 (56)                  | C: 7.7<br>T: 8.8                | P<br>DB  | 3              | β-glucan         | no<br>β-glucan     | 3             | bread          | usual              | n/r     | Greece         |

Continued on p. 760

Table 1—Continued

| Study                    | Participants*<br>M:F | Age* y             | BMI*<br>kg/m <sup>2</sup>       | Baseline<br>HbA1c*<br>% (mmol/mol)          | Baseline FG*<br>mmol/L         | Design   | Duration<br>wk | Viscous<br>Fiber | Control                        | Dose**<br>g/d | Food<br>Matrix        | Diet    | Funding | Country           |
|--------------------------|----------------------|--------------------|---------------------------------|---------------------------------------------|--------------------------------|----------|----------------|------------------|--------------------------------|---------------|-----------------------|---------|---------|-------------------|
| Ma, 2013                 | 186<br>n/r           | 57.5†              | C: 26.6<br>TA: 26.6<br>TB: 26.7 | C: 9.7 (83)<br>TA: 9.9 (85)<br>TB: 9.8 (84) | C: 9.5<br>TA: 10.1<br>TB: 10.1 | P<br>SB  | 4              | β-glucan         | no<br>β-glucan                 | 2.55          | oat                   | SDI     | I       | China             |
| McGeoch, 2013            | 27<br>18M:9F         | 60.9               | 31.5                            | 6.8 (51)                                    | n/r                            | C<br>NB  | 8              | β-glucan         | no<br>β-glucan                 | 4             | oat-based<br>products | usual   | A       | United<br>Kingdom |
| Niemi, 1988              | 18                   | 63                 | 27                              | C: 11.4 (101)                               | C: 12.5                        | C        | 12             | guar gum         | micro-crystalline<br>cellulose | 15            | n/r                   | usual   | A-I     | Finland           |
|                          | n/r                  |                    |                                 | T: 12.1 (109)                               | T: 11.7                        | DB       |                |                  |                                |               |                       |         |         |                   |
| Peterson, 1987           | 16<br>10M:6F         | 60                 | 27.3                            | C: 11.3 (100)<br>T: 11.2 (99)               | C: 9.7<br>T: 9.5               | C<br>n/r | 6              | guar gum         | no guar<br>gum                 | 16.6          | granules              | usual   | A       | United<br>Kingdom |
| Rodriguez-Moran,<br>1998 | 123<br>55M:68F       | C: 56.5<br>T: 57.0 | C: 28.6<br>T: 29.1              | n/r                                         | C: 7.8<br>T: 10.7              | P<br>DB  | 6              | psyllium         | micro-crystalline<br>cellulose | 15            | powder                | low-fat | n/r     | Mexico            |
| Sels, 1993               | 12<br>6M:6F          | 62                 | 25.8                            | 11.3 (100)                                  | 9.8                            | C<br>n/r | 12             | guar gum         | HF control bread               | 11.2          | bread                 | usual   | n/r     | Netherlands       |
| Uusitupa, 1990           | 9<br>4M:5F           | 47.8               | n/r                             | n/r                                         | 10.6                           | C<br>DB  | 4              | guar gum         | wheat flour                    | 15            | granules              | usual   | n/r     | Finland           |
| Uusitupa, 1989           | 39<br>13M:26F        | C: 60.9<br>T: 60.1 | n/r                             | C: 9.4 (79)<br>T: 8.9 (74)                  | C: 12.8<br>T: 12.2             | P<br>DB  | 12             | guar gum         | wheat flour                    | 15            | granules              | usual   | A       | Finland           |
| Uusitupa, 1984           | 17<br>n/r            | 62                 | n/r                             | n/r                                         | 9.7                            | C<br>DB  | 18             | guar gum         | wheat flour                    | 21            | granules              | usual   | n/r     | Finland           |
| Vuksan, 1999             | 11<br>5M:6F          | M: 62<br>F: 59     | n/r                             | M: 7.4 (57)<br>F: 8.3 (67)                  | C: 9.3<br>T: 9.6               | C<br>DB  | 3              | konjac           | wheat bran                     | 15.1          | biscuit               | NCEP    | I       | Canada            |
| Wolffenbut, 1992         | 12<br>6M:6F          | 62                 | 25.8                            | 11.3 (100)                                  | 9.8                            | C<br>n/r | 12             | guar gum         | control bread                  | 11.2          | powder                | usual   | n/r     | Netherlands       |
| Ziai, 2005               | 36<br>n/r            | C: 53.6<br>T: 51.9 | C: 27.5<br>T: 26.6              | C: 9.1 (76)<br>T: 10.5 (91)                 | C: 9.9<br>T: 11.6              | P<br>DB  | 8              | psyllium         | micro-crystalline<br>cellulose | 10.2          | powder                | usual   | n/r     | Iran              |

A, agency; A-I, agency-industry; C, control; Cr, crossover; DB, double blind; F, female; FG, fasting glucose; I, industry; M, male; NB, not blinded; NCEP, National Cholesterol Education Program; n/r, not reported; OL, open label; P, parallel; SB, single blind; SDI, Structured Dietary Intervention; T, treatment; TA, treatment A; TB, treatment B. \*Mean values presented. †Dose of viscous fiber.

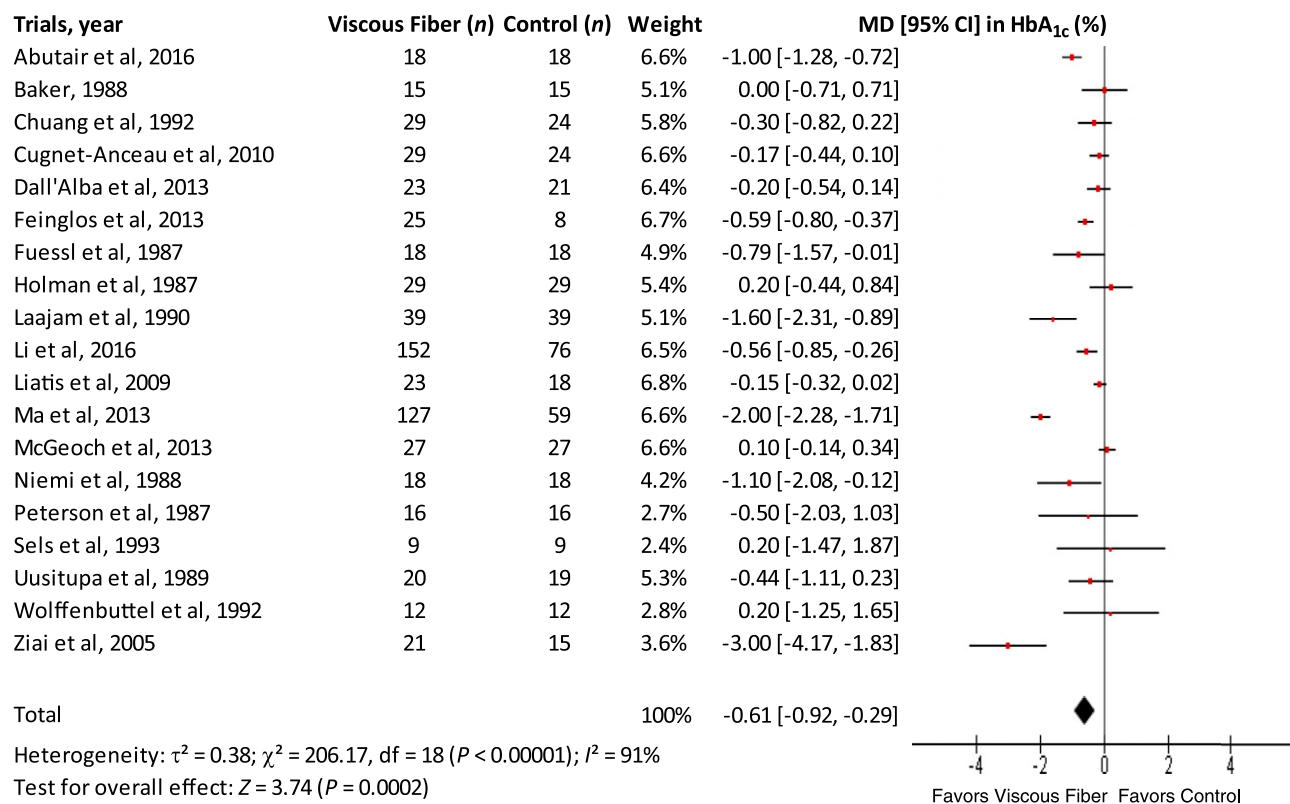

**Figure 2**—The effect of viscous fiber supplementation in individuals with type 2 diabetes on primary outcome HbA<sub>1c</sub>. Diamond represents the pooled effect estimate for overall analysis. Data are represented as MD with 95% CI, using the generic inverse variance random-effects model. Interstudy heterogeneity quantified by  $I^2$  with significance  $P < 0.10$ .

### Dose-Response Analyses

There was no significant evidence of a dose-response effect (Supplementary Figs. 5 and 6). Visual inspection of data suggests doses  $>10$  g/day may be more effective in HOMA-IR improvement, but the difference in slopes for  $<10$  vs.  $>10$  g/day was not significant ( $P = 0.06$ ). Because of insufficient data, dose-response analyses could not be conducted for fructosamine and only linear analysis was performed for fasting insulin.

### Publication Bias

Supplementary Fig. 7 shows the funnel plots for HbA<sub>1c</sub>, fasting glucose, and HOMA-IR. Visual inspection of funnel plots suggests no asymmetry in HbA<sub>1c</sub> and fasting glucose and mild asymmetry in HOMA-IR. Formal testing with the Egger and Begg tests was not significant for evidence of small-study effects. Trim and fill analyses were conducted for HOMA-IR, identifying four additional studies imputed to adjust for funnel plot asymmetry (Supplementary Fig. 8). Inclusion of imputed studies resulted

in an adjusted MD of  $-2.67$  (95% CI  $-4.17, -1.18$ ),  $P < 0.01$ , suggesting evidence of small-study effects. Publication bias was not assessed for fasting insulin and fructosamine as there were  $<10$  trial comparisons available.

### Grading of the Evidence

Supplementary Table 3 shows the summary of the GRADE assessment for each outcome. The effect estimates for HbA<sub>1c</sub>, fasting glucose, fasting insulin, and HOMA-IR were graded as moderate quality based on downgrades of serious inconsistency for HbA<sub>1c</sub>, fasting glucose, and HOMA-IR and serious imprecision for fasting insulin. Evidence for fructosamine was graded low quality owing to downgrades for very serious imprecision.

### CONCLUSIONS

This systematic review and meta-analysis quantified the effect of viscous fiber supplementation on indices of glycemic control in 28 RCT comparisons involving individuals with type 2 diabetes. Pooled analyses demonstrate an

absolute reduction of 0.58% in HbA<sub>1c</sub>, 0.82 mmol/L in fasting blood glucose, and 1.89 in HOMA-IR following a median dose of  $\sim 13.1$  g/day for a median duration of  $\sim 8$  weeks. No significant effects were revealed for fasting insulin and fructosamine. Subgroup analyses revealed those with higher baseline HbA<sub>1c</sub> and HOMA-IR values appear to show greater reductions. There did not appear to be any subgroup effects of dose, design, duration, baseline BMI, fiber type, or the form of intervention.

Results from our analyses suggest that viscous fiber may be clinically meaningful in the management of type 2 diabetes, with reductions in HbA<sub>1c</sub> exceeding the U.S. Food and Drug Administration threshold of  $\geq 0.3\%$  established for new antihyperglycemic drug development (50). Our findings build on those of an earlier systematic review and meta-analysis by Silva et al. (51), who reported a decrease of 0.52% in HbA<sub>1c</sub> and 0.55 mmol/L in fasting blood glucose in type 2 diabetes patients following a high intake of various types of dietary fiber, including soluble and insoluble



**A**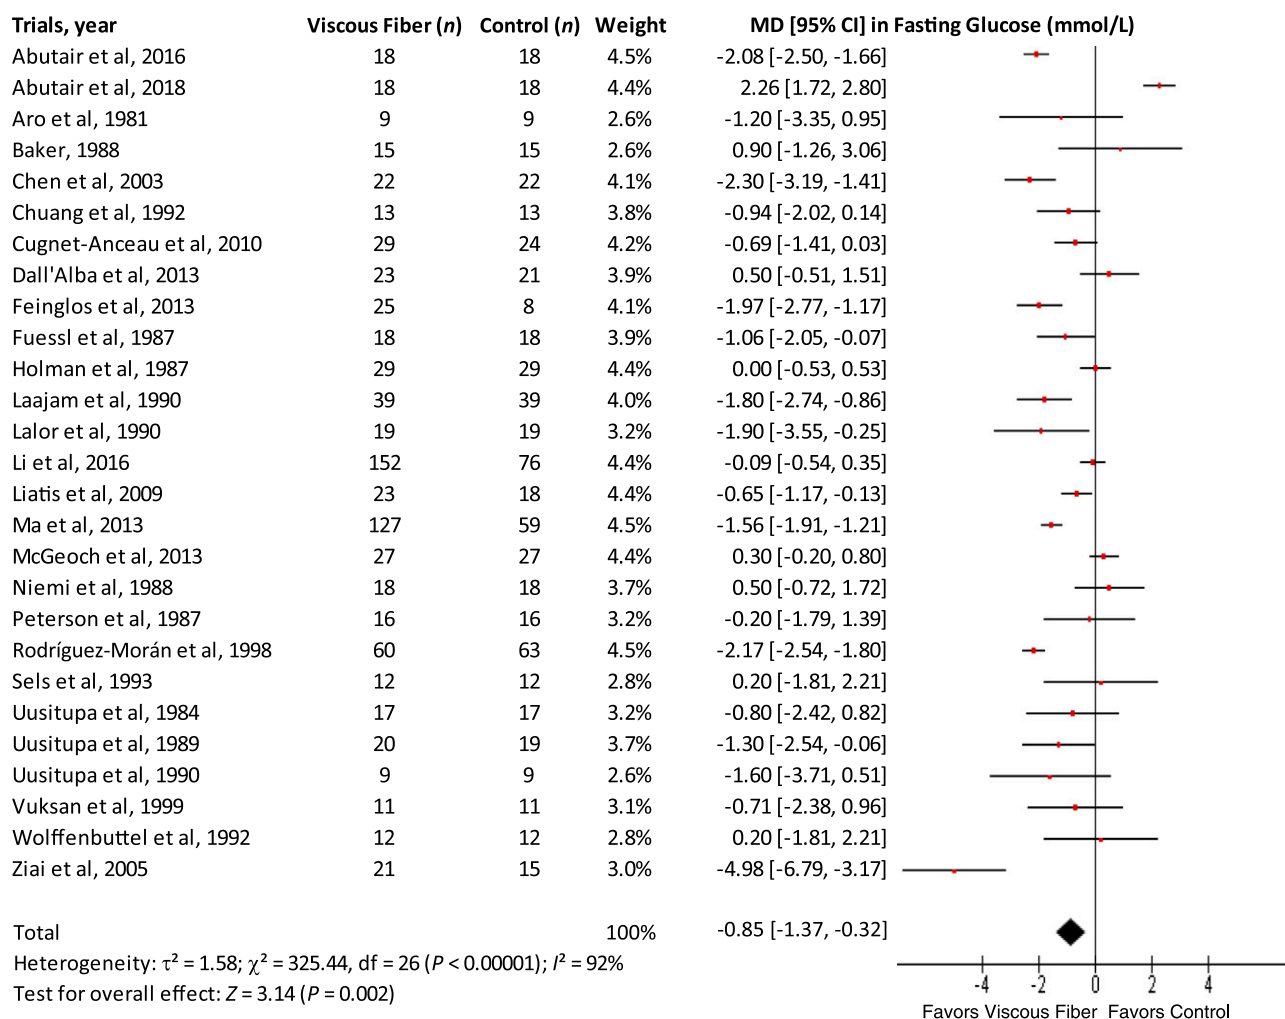**B**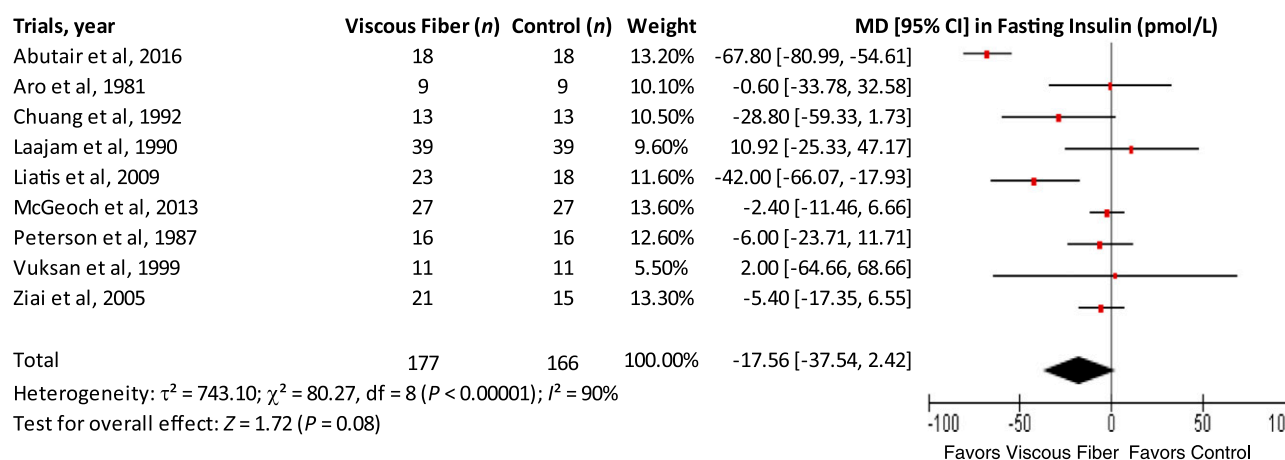

**Figure 3**—The effect of viscous fiber supplementation in individuals with type 2 diabetes on secondary outcomes: fasting glucose (A), fasting insulin (B), HOMA-IR (C), and fructosamine (D). Diamond represents the pooled effect estimate for overall analysis. Data are represented as MD with 95% CI, using the generic inverse variance random-effects and fixed-effects models. Interstudy heterogeneity is quantified by  $I^2$  with significance  $P < 0.10$ .



## C

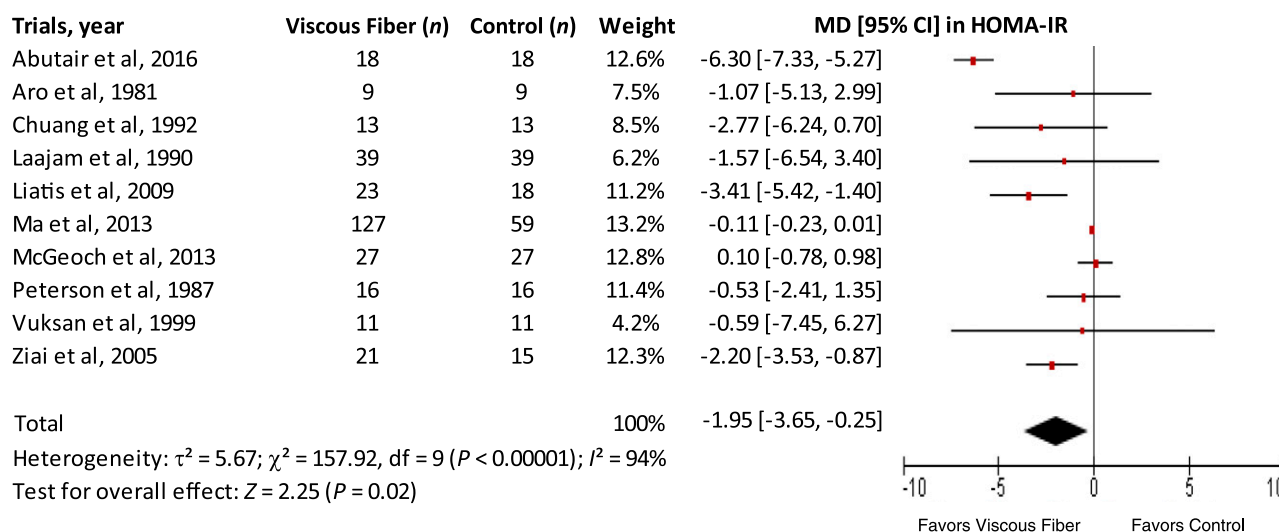

## D

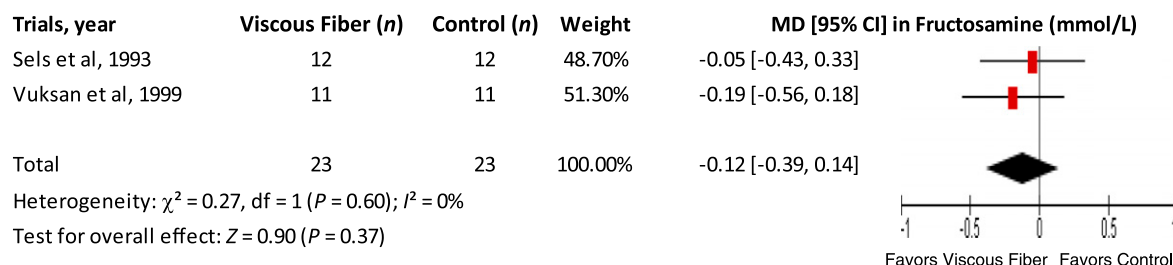

Figure 3—Continued.

sources, from 12 RCTs. Although the two reviews cannot be directly compared given the variation in study inclusion criteria, it is interesting that there was a similar reduction in HbA<sub>1c</sub>, suggesting that the benefits observed by Silva et al. (51) may be mostly attributed to viscous fiber. Despite this similarity, grouping viscous soluble and insoluble fiber does not provide a reliable estimate of metabolic benefit as it is analogous to grouping therapeutic entities with different physiochemical and, hence, physiological characteristics. While insoluble fiber seems to have specific application, likely in the area of colonic health and stool bulking, viscous fibers appear to have pleiotropic effects metabolically, as they improve glycemic control, lipid levels, blood pressure, and possibly weight, in addition to potential prebiotic activity (52). Conversely, the strong and consistent paradoxical association of non-viscous cereal fiber and whole-grain consumption to reduced type 2 diabetes incidence from prospective cohort data

remains of important clinical interest (53). Although residual confounding might preclude a potential case for causality, the recently hypothesized link of modulating gut microbiota by extended cereal fiber intake deserves further investigation (54). The protective role of cereal fiber against type 2 diabetes should therefore not be overlooked and fits within a broader public health case for increasing overall dietary fiber intake.

The variable efficacy of fiber on glycemic control was first highlighted in a seminal study in which Jenkins et al. (55) compared the response to an oral glucose tolerance test supplemented with five fiber types varying in level of viscosity. A positive correlation was found between the viscosity of the fiber type and reduction in peak postprandial blood glucose and insulin concentrations (55). This benefit was abolished when fiber was hydrolyzed to its nonviscous form (55). Thus, through its effect in changing the rate of nutrient delivery and endocrine response, viscous fiber intake

resulted in flattening of the glycemic response and reduced insulin requirements, ultimately leading to a reduction in HbA<sub>1c</sub>, as observed in the present analysis. More recently, Chandalia et al. (56) demonstrated that an effective level of intake can be achieved by consuming fiber-rich foods. In that study, they found that doubling fiber intake above the level recommended by ADA at the time achieved a powerful reduction in 24-h blood glucose and hyperinsulinemia (56). The authors concluded that these effects seem to be predominantly a result of increasing the viscous fiber foods from the typically recommended 8 g/day in the control arm to 25 g/day in the test arm, a difference that approximates the median effective dose of 13.1 g/day seen in the current study. Further supporting the case for viscosity, a study comparing several types of viscous fiber supplements revealed that the most viscous fiber, konjac glucomannan, resulted in the greatest reduction of postprandial blood glucose

(57). These acute benefits were translated to long-term metabolic improvements in individuals with type 2 diabetes and metabolic syndrome (46,58), as well as lipid lowering in healthy individuals, compared with lower viscosity fibers including insoluble fiber or wheat bran control (52). Similarly, a 6-month intervention study in participants with metabolic syndrome showed no glycemic benefits on the American Heart Association Step II diet, but the addition of 7 g/day of psyllium fiber led to a sustained improvement in glycemic and insulinemic response, including a significant reduction of 0.6% in HbA<sub>1c</sub> (59).

Despite a relatively small quantity of viscous fiber being required to obtain clinically meaningful benefits in diabetes, the main challenge remains how to incorporate it into foods while preserving sensory characteristics. From a palatability standpoint, semimoist foods including crisp breads, crackers, muffins, and biscuits are suggested to be the most suitable vehicles for optimal fiber delivery (60).

Even though the prevalent notion is to favor food rather than supplement use as a primary source of fiber, the use of the latter would allow one to achieve the goal of an individualized eating plan even in the absence of major dietary restrictions, such as in the context of lack of willingness or ability of an individual to change (8). Notably, with the exception of one study where treatment was through diet only, studies included in our analysis utilized fiber supplements as the intervention, with antihyperglycemic oral medication and insulin having not been altered throughout the study period. This suggests that the effect of viscous fiber, primarily through supplements, seen within the pooled analysis is beyond that of standard pharmaceutical therapy.

The current study has several strengths. Importantly, to our knowledge this is one of the largest and most comprehensive systematic reviews and meta-analyses of RCTs on dietary fiber, in particular investigating the isolated effect of viscous fiber sources in diabetes. No prior study had differentiated dietary fiber on the basis of viscosity but rather had done so on the basis of the gravimetrics. Furthermore, the majority of trials in this study reported glycemic control end points as the primary

outcome and the study included trials spanning multiple countries, thereby allowing for generalizability of findings and reducing potential confounders associated with a single geographic location. Finally, the overall quality and strength of evidence was assessed using the GRADE approach.

Limitations of this analysis should also be recognized when interpreting the findings. First, we downgraded the certainty of the evidence for serious inconsistency in the estimates across trials for some of the assessed outcomes. This was due to evidence of heterogeneity that could not be explained by sensitivity and subgroup analyses. Further, the certainty of the evidence was downgraded for serious and very serious imprecision. Although the 95% CI of the pooled effect estimate for some of our outcomes did not overlap with our minimally important difference for harm (i.e., did not contain evidence for harm), the upper bound of the 95% CI included 0. The number of participants for the fructosamine outcome was also less than the optimal information size criterion, which resulted in an additional downgrade for imprecision owing to insufficient power. Due to the small number of observations for some outcomes, meta-regression analyses could not be conducted, limiting our exploration of these outcomes. Additionally, of the included trials, only 11 had a duration of 12 weeks or longer and 13 trials were less than 8 weeks in length. Given the conventional estimate that HbA<sub>1c</sub> reflects blood glucose levels in the preceding three months, inclusion of shorter trials potentially underestimated the effect size, as they may not have been of sufficient duration. The certainty of evidence was not downgraded for indirectness as subgroup analyses revealed no effect modulation by duration. It was also not downgraded for risk of bias as plausible selection bias was unlikely to seriously alter the results. Finally, there was evidence of publication bias. Although visual inspection of the funnel plots suggested asymmetry for HOMA-IR and trim and fill analyses suggested small-study effects, we elected not to downgrade for publication bias, as Egger and Begg tests were not significant and the adjusted pooled effect estimate after trim and fill analyses did not change direction or significance.

Balancing the strengths and limitations, we graded the overall certainty of available evidence as moderate for HbA<sub>1c</sub>, fasting glucose, fasting insulin, and HOMA-IR and low for fructosamine.

## Conclusion

This study illustrated that viscous fiber supplementation improved conventional markers of glycemic control beyond usual care in individuals with type 2 diabetes. Future dietary guidelines should be revisited in light of these findings, although taking into consideration the limitations raised by GRADE. Additional high-quality RCTs are required to further explore the effect by fiber type and to optimize the incorporation of highly viscous supplements into the daily diet.

**Acknowledgments.** The authors thank Teruko Kishibe, Information Specialist, Scotiabank Health Science Library at St. Michael's Hospital, for her help in the development of search terms used.

**Funding and Duality of Interest.** R.K. and N.M. have received funding from the King Abdullah Scholarship Program, Saudi Arabia. J.L.S. was funded by a PSI Graham Farquharson Knowledge Translation Fellowship; Canadian Diabetes Association Clinician Scientist Award; Canadian Institutes of Health Research Institute of Nutrition, Metabolism and Diabetes/Canadian Nutrition Society New Investigator Partnership Prize; and Banting & Best Diabetes Centre Sun Life Financial New Investigator Award. J.L.S. has also received research support from Diabetes Canada, the American Society for Nutrition, Calorie Control Council, INC International Nut and Dried Fruit Council Foundation, National Dried Fruit Trade Association, the Tate and Lyle Nutritional Research Fund at the University of Toronto, and the Glycemic Control and Cardiovascular Disease in Type 2 Diabetes Fund at the University of Toronto (a fund established by the Alberta Pulse Growers). He has received speaker fees and/or honoraria from Diabetes Canada, the Canadian Nutrition Society, Dr. Pepper Snapple Group, Dairy Farmers of Canada, Sprim Brasil, White-Wave Foods, Rippe Lifestyle, mdBriefcase, Alberta Milk, FoodMinds LLC, Memac Ogilvy & Mather LLC, PepsiCo, The Ginger Network LLC, International Sweeteners Association, Nestlé Nutrition Institute, Pulse Canada, Canadian Society for Endocrinology and Metabolism (CSEM), and GI Foundation. He has ad hoc consulting arrangements with Winston & Strawn LLP, Perkins Coie LLP, and Tate & Lyle. He is a member of the European Fruit Juice Association Scientific Expert Panel. He is on the clinical practice guidelines expert committees of Diabetes Canada, the European Association for the Study of Diabetes (EASD), and the Canadian Cardiovascular Society, as well as an expert writing panel of the American Society for Nutrition. He serves as an unpaid

scientific advisor for the Food, Nutrition, and Safety Program and the Technical Committee on Carbohydrates of the International Life Science Institute North America. He is a member of the International Carbohydrate Quality Consortium, Executive Board Member of the Diabetes and Nutrition Study Group (DNSG) of the EASD, and director of the Toronto 3D Knowledge Synthesis and Clinical Trials Foundation. His wife is an employee of Unilever Canada. A.L.J. is part owner and Vice President at Glycemic Index Laboratories, Inc. (GI Labs), a contract research organization. L.D. has previously received honoraria for speaking and consultancy and grants for attending scientific conferences from Abbott, Amgen, AstraZeneca, Boehringer Ingelheim, Eli Lilly, Merck, Merck Sharp & Dohme, Novo Nordisk, Novartis, Sanofi, Servier, and Takeda. V.V. holds a research grant from the Canadian Diabetes Association for study of dietary intervention including viscous soluble fiber and holds the Canadian (2,410,556) and American (7,326,404) patents on the medical use of viscous fiber blend for reducing blood glucose for treatment of diabetes, increasing insulin sensitivity, and reducing systolic blood pressure and blood lipids.

None of the sponsors had a role in any aspect of the current study, including design and conduct of the study; collection, management, analysis, and interpretation of the data; and preparation, review, and approval of the manuscript or decision to publish.

**Author Contributions.** E.J., A.Z., A.K., H.V.T.H., and V.V. designed the research. R.K. and N.M. conducted the research. R.K., A.K., J.L.S., S.B.M., and D.L. performed or assisted in performing the statistical analysis of the data. E.J., R.K., A.Z., A.K., A.L.J., and L.D. wrote the manuscript draft. E.J., J.L.S., and V.V. had primary responsibility for the final content. All authors contributed to the critical revision of the manuscript for important intellectual content and approved the final manuscript.

**Prior Presentation.** Parts of this work were presented in abstract and poster form at the 2017 CSEM/Diabetes Canada Professional Conference and Annual Meetings, Edmonton, Canada, 1–4 November 2017, and in abstract form and short oral presentation at the DNSG-EASD 36th Symposium on Diabetes and Nutrition, Opatija, Croatia, 27–30 June 2018.

## References

- McRae MP. Dietary fiber intake and type 2 diabetes mellitus: an umbrella review of meta-analyses. *J Chiropr Med* 2018;17:44–53
- Evert AB, Boucher JL, Cypress M, et al. Nutrition therapy recommendations for the management of adults with diabetes. *Diabetes Care* 2014;37(Suppl. 1):S120–S143
- American Diabetes Association. 4. Lifestyle management: *Standards of Medical Care in Diabetes—2018*. *Diabetes Care* 2018;41(Suppl. 1):S38–S50
- Vuksan V, Rogovik AL, Jovanovski E, Jenkins AL. Fiber facts: benefits and recommendations for individuals with type 2 diabetes. *Curr Diab Rep* 2009;9:405–411
- Anderson JW, Baird P, Davis RH Jr, et al. Health benefits of dietary fiber. *Nutr Rev* 2009;67:188–205
- Tabatabai A, Li S. Dietary fiber and type 2 diabetes. *Clin Excell Nurse Pract* 2000;4:272–276
- Anderson JW, Randles KM, Kendall CW, Jenkins DJ. Carbohydrate and fiber recommendations for individuals with diabetes: a quantitative assessment and meta-analysis of the evidence. *J Am Coll Nutr* 2004;23:5–17
- American Diabetes Association. 9. Cardiovascular disease and risk management: *Standards of Medical Care in Diabetes—2018*. *Diabetes Care* 2018;41(Suppl. 1):S86–S104
- Agricultural Research Service. Dietary fiber (g): usual intakes from food and water, 2003–2006, compared to adequate intakes. In *What We Eat in America, NHANES 2003–2006*. Beltsville, MD, U.S. Department of Agriculture, 2010
- Mobley AR, Jones JM, Rodriguez J, Slavin J, Zelman KM. Identifying practical solutions to meet America's fiber needs: proceedings from the Food & Fiber Summit. *Nutrients* 2014;6:2540–2551
- Wheeler ML, Dunbar SA, Jaacks LM, et al. Macronutrients, food groups, and eating patterns in the management of diabetes: a systematic review of the literature, 2010. *Diabetes Care* 2012;35:434–445
- McRorie JW Jr. Evidence-based approach to fiber supplements and clinically meaningful health benefits, part 1: what to look for and how to recommend an effective fiber therapy. *Nutr Today* 2015;50:82–89
- McRorie JW Jr. Evidence-based approach to fiber supplements and clinically meaningful health benefits, part 2: what to look for and how to recommend an effective fiber therapy. *Nutr Today* 2015;50:90–97
- Higgins JPT, Green S (Eds.). *Cochrane Handbook for Systematic Reviews of Interventions*, Version 5.1.0 [Internet]. The Cochrane Collaboration, 2011. Available from <https://handbook-5-1.cochrane.org/>. Accessed 15 June 2018
- Moher D, Liberati A, Tetzlaff J, Altman DG; PRISMA Group. Preferred reporting items for systematic reviews and meta-analyses: the PRISMA statement. *PLoS Med* 2009;6:e1000097
- U.S. Food and Drug Administration. Guidance for Industry: Evidence-Based Review System for the Scientific Evaluation of Health Claims. Silver Springs, MD, U.S. Department of Health and Human Services, 2009. Available from <https://www.fda.gov/Food/GuidanceRegulation/GuidanceDocumentsRegulatoryInformation/LabelingNutrition/ucm073332.htm>. Accessed 30 March 2018
- Berard LD, Blumer I, Houlden R, Miller D, Woo V; Canadian Diabetes Association Clinical Practice Guidelines Expert Committee. Monitoring glycemic control. *Can J Diabetes* 2013;37(Suppl. 1):S35–S39
- American Diabetes Association. 2. Classification and diagnosis of diabetes: *Standards of Medical Care in Diabetes—2018*. *Diabetes Care* 2018;41(Suppl. 1):S13–S27
- Anderson JW, Bridges SR. Dietary fiber content of selected foods. *Am J Clin Nutr* 1988;47:440–447
- Rodríguez-Morán M, Guerrero-Romero F, Lazcano-Burciaga G. Lipid- and glucose-lowering efficacy of Plantago Psyllium in type II diabetes. *J Diabetes Complications* 1998;12:273–278
- McGeoch SC, Johnstone AM, Lobley GE, et al. A randomized crossover study to assess the effect of an oat-rich diet on glycaemic control, plasma lipids and postprandial glycaemia, inflammation and oxidative stress in type 2 diabetes. *Diabet Med* 2013;30:1314–1323
- Muniyappa R, Lee S, Chen H, Quon MJ. Current approaches for assessing insulin sensitivity and resistance in vivo: advantages, limitations, and appropriate usage. *Am J Physiol Endocrinol Metab* 2008;294:E15–E26
- Pentz M, Shott M, Aprahamian F. *Handling Experimental Data*. Milton Keynes, U.K., Open University Press, 1988
- Guyatt GH, Oxman AD, Vist GE, et al.; GRADE Working Group. GRADE: an emerging consensus on rating quality of evidence and strength of recommendations. *BMJ* 2008;336:924–926
- Abutair AS, Naser IA, Hamed AT. Soluble fibers from psyllium improve glycemic response and body weight among diabetes type 2 patients (randomized control trial). *Nutr J* 2016;15:86
- Aro A, Uusitupa M, Voutilainen E, Hersio K, Korhonen T, Siitonen O. Improved diabetic control and hypocholesterolaemic effect induced by long-term dietary supplementation with guar gum in type 2 (insulin-independent) diabetes. *Diabetologia* 1981;21:29–33
- Baker P. Placebo-controlled trial of guar in poorly controlled type II diabetes. *Pract Diabetes* 1988;5:36–38
- Chen HL, Sheu WH, Tai TS, Liaw YP, Chen YC. Konjac supplement alleviated hypercholesterolemia and hyperglycemia in type 2 diabetic subjects—a randomized double-blind trial. *J Am Coll Nutr* 2003;22:36–42
- Chuang LM, Jou TS, Yang WS, et al. Therapeutic effect of guar gum in patients with non-insulin-dependent diabetes mellitus. *J Formos Med Assoc* 1992;91:15–19
- Cugnet-Anceau C, Nazare JA, Biorklund M, et al. A controlled study of consumption of  $\beta$ -glucan-enriched soups for 2 months by type 2 diabetic free-living subjects. *Br J Nutr* 2010;103:422–428
- Dall'Alba V, Silva FM, Antonio JP, et al. Improvement of the metabolic syndrome profile by soluble fibre – guar gum – in patients with type 2 diabetes: a randomised clinical trial. *Br J Nutr* 2013;110:1601–1610
- Feinglos MN, Gibb RD, Ramsey DL, Surwit RS, McRorie JW. Psyllium improves glycemic control in patients with type-2 diabetes mellitus. *Bioactive Carbohydr Diet Fibre*. 2013;1:156–161
- Fuessl HS, Williams G, Adrian TE, Bloom SR. Guar sprinkled on food: effect on glycaemic control, plasma lipids and gut hormones in non-insulin dependent diabetic patients. *Diabet Med* 1987;4:463–468
- Holman RR, Steemson J, Darling P, Turner RC. No glycemic benefit from guar administration in NIDDM. *Diabetes Care* 1987;10:68–71
- Laajam MA, Jim LK, El-Bolbol S, et al. Guar gum in non-insulin-dependent diabetes mellitus: a double-blind crossover, placebo-controlled trial in Saudi Arabian patients. *Ann Saudi Med* 1990;10:525–530
- Lalor BC, Bhatnagar D, Winocour PH, et al. Placebo-controlled trial of the effects of guar gum and metformin on fasting blood glucose and serum lipids in obese, type 2 diabetic patients. *Diabet Med* 1990;7:242–245
- Li X, Cai X, Ma X, et al. Short- and long-term effects of wholegrain oat intake on weight management and glucolipid metabolism in overweight type-2 diabetics: a randomized control trial. *Nutrients* 2016;8:E549

38. Liatis S, Tsapogas P, Chala E, et al. The consumption of bread enriched with betaglucan reduces LDL-cholesterol and improves insulin resistance in patients with type 2 diabetes. *Diabetes Metab* 2009;35:115–120
39. Ma X, Gu J, Zhang Z, et al. Effects of Avena nuda L. on metabolic control and cardiovascular disease risk among Chinese patients with diabetes and meeting metabolic syndrome criteria: secondary analysis of a randomized clinical trial. *Eur J Clin Nutr* 2013;67:1291–1297
40. Niemi MK, Keinänen-Kiukaanniemi SM, Salmela PI. Long-term effects of guar gum and microcrystalline cellulose on glycaemic control and serum lipids in type 2 diabetes. *Eur J Clin Pharmacol* 1988;34:427–429
41. Peterson DB, Ellis PR, Baylis JM, et al. Low dose guar in a novel food product: improved metabolic control in non-insulin-dependent diabetes. *Diabet Med* 1987;4:111–115
42. Sels JP, Postmes TJL, Nieman F, Ebert R, Wolffenbuttel BHR, Kruseman ACN. Effects of guar bread in type 1 and type 2 diabetes mellitus. *Eur J Intern Med* 1993;4:193–200
43. Uusitupa M, Södervik H, Silvasti M, Karttunen P. Effects of a gel forming dietary fiber, guar gum, on the absorption of glibenclamide and metabolic control and serum lipids in patients with non-insulin-dependent (type 2) diabetes. *Int J Clin Pharmacol Ther Toxicol* 1990;28:153–157
44. Uusitupa M, Siitonen O, Savolainen K, Silvasti M, Penttilä I, Parviainen M. Metabolic and nutritional effects of long-term use of guar gum in the treatment of noninsulin-dependent diabetes of poor metabolic control. *Am J Clin Nutr* 1989;49:345–351
45. Uusitupa M, Tuomilehto J, Karttunen P, Wolf E. Long term effects of guar gum on metabolic control, serum cholesterol and blood pressure levels in type 2 (non-insulin-dependent) diabetic patients with high blood pressure. *Ann Clin Res* 1984;16(Suppl. 43):126–131
46. Vuksan V, Jenkins DJ, Spadafora P, et al. Konjac-mannan (glucomannan) improves glycaemia and other associated risk factors for coronary heart disease in type 2 diabetes. A randomized controlled metabolic trial. *Diabetes Care* 1999;22:913–919
47. Wolffenbuttel BH, Sels JP, Heesen BJ, Menheere PP, Nieuwenhuijzen Kruseman AC. Effects of dietary fiber and insulin treatment on serum levels of lipids and lipoprotein (a) in patients with type II diabetes mellitus. *Ned Tijdschr Geneesk* 1992;136:739–742 [in Dutch]
48. Ziai SA, Larijani B, Akhoondzadeh S, et al. Psyllium decreased serum glucose and glycosylated hemoglobin significantly in diabetic outpatients. *J Ethnopharmacol* 2005;102:202–207
49. Abutair AS, Naser IA, Hamed AT. The effect of soluble fiber supplementation on metabolic syndrome profile among newly diagnosed type 2 diabetes patients. *Clin Nutr Res* 2018;7:31–39
50. U.S. Food and Drug Administration. Guidance for Industry. Diabetes Mellitus: Developing Drugs and Therapeutic Biologics for Treatment and Prevention. Rockville, MD, U.S. Department of Health and Human Services, 2008
51. Silva FM, Kramer CK, de Almeida JC, Steemburgo T, Gross JL, Azevedo MJ. Fiber intake and glycemic control in patients with type 2 diabetes mellitus: a systematic review with meta-analysis of randomized controlled trials. *Nutr Rev* 2013;71:790–801
52. Vuksan V, Jenkins AL, Rogovik AL, Fairgrieve CD, Jovanovski E, Leiter LA. Viscosity rather than quantity of dietary fibre predicts cholesterol-lowering effect in healthy individuals. *Br J Nutr* 2011;106:1349–1352
53. InterAct Consortium. Dietary fibre and incidence of type 2 diabetes in eight European countries: the EPIC-InterAct Study and a meta-analysis of prospective studies. *Diabetologia* 2015;58:1394–1408
54. Davison KM, Temple NJ. Cereal fiber, fruit fiber, and type 2 diabetes: explaining the paradox. *J Diabetes Complications* 2018;32:240–245
55. Jenkins DJ, Wolever TM, Leeds AR, et al. Dietary fibres, fibre analogues, and glucose tolerance: importance of viscosity. *BMJ* 1978;1:1392–1394
56. Chandalia M, Garg A, Lutjohann D, von Bergmann K, Grundy SM, Brinkley LJ. Beneficial effects of high dietary fiber intake in patients with type 2 diabetes mellitus. *N Engl J Med* 2000;342:1392–1398
57. Vuksan V, Sievenpiper JL, Xu Z, et al. Konjac-mannan and American ginseng: emerging alternative therapies for type 2 diabetes mellitus. *J Am Coll Nutr* 2001;20(5 Suppl.):370S–380S; discussion 381S–383S
58. Vuksan V, Sievenpiper JL, Owen R, et al. Beneficial effects of viscous dietary fiber from Konjac-mannan in subjects with the insulin resistance syndrome: results of a controlled metabolic trial. *Diabetes Care* 2000;23:9–14
59. Cicero AFG, Derosa G, Bove M, Imola F, Borghi C, Gaddi AV. Psyllium improves dyslipidaemia, hyperglycaemia and hypertension, while guar gum reduces body weight more rapidly in patients affected by metabolic syndrome following an AHA Step 2 diet. *Mediterr J Nutrition Metab* 2010;3:47–54
60. Ellis PR, Kamalanathan T, Dawoud FM, Strange RN, Coulgate TP. Evaluation of guar biscuits for use in the management of diabetes: tests of physiological effects and palatability in non-diabetic volunteers. *Eur J Clin Nutr* 1988;42:425–435
